# Supplementary material for: Gut microbiota‐derived synbiotic formula (SIM01) as a novel adjuvant therapy for COVID‐19: An open‐label pilot study
Source: PubMed Central journal article supplement — J Gastroenterol Hepatol. 2022 Mar 2;37(5):823–31. doi: 10.1111/jgh.15796 (PMC9115073; doi:10.1111/jgh.15796), 2022-03-02
Supplement: JGH-37-823-s001.pdf [file JGH-37-823-s001.pdf]

**Supplementary Figure 1. Relative abundance of probiotic species contained in SIM01**

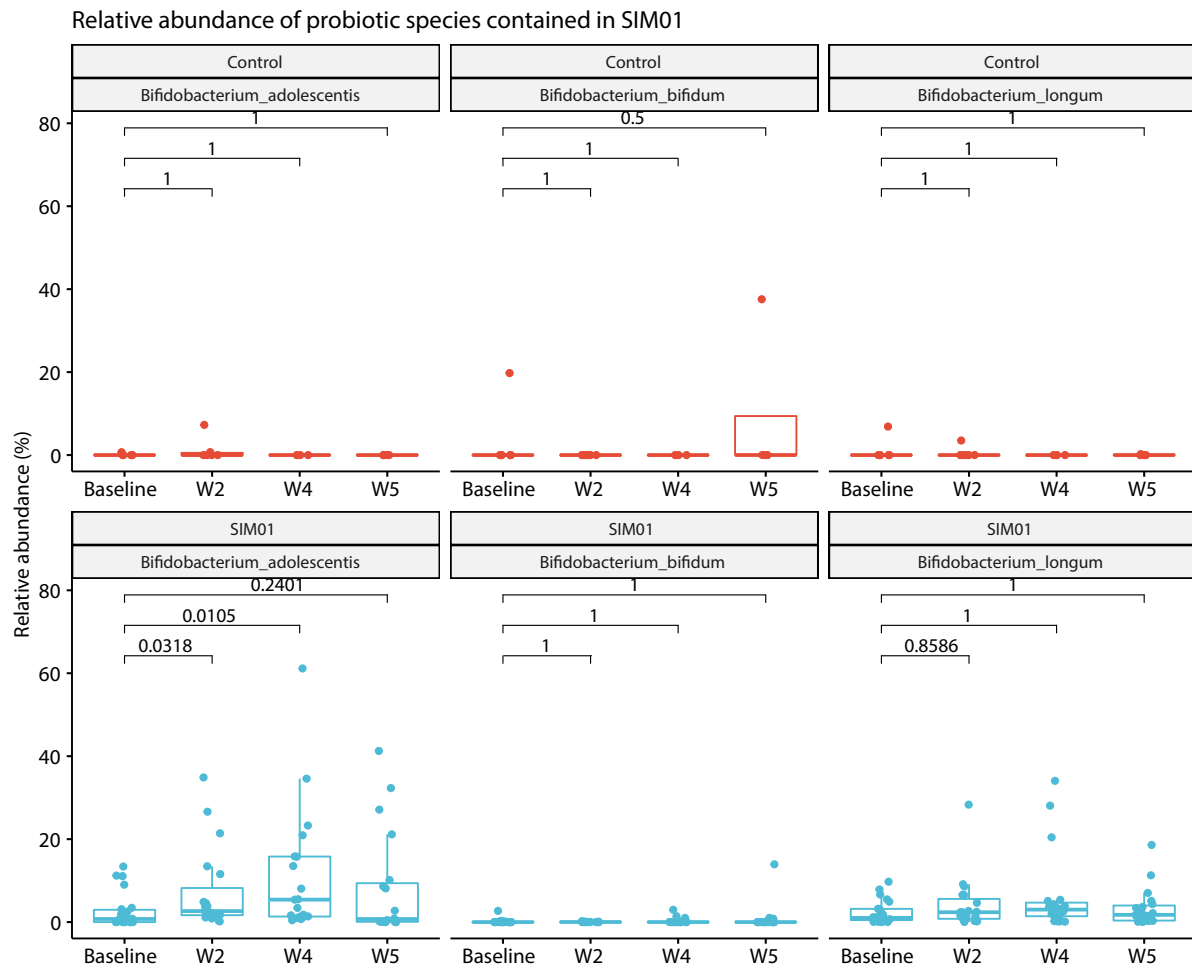

**Figure legend:** Relative abundance of three probiotic species (*B. adolescentis*, *B. bifidum*, *B. longum*) contained in SIM01 at baseline, week 2, week 4 and week 5 in the control (upper panel) and SIM01 (lower panel) groups. P values were determined by Friedman test, Post-hoc: Wilcoxon signed-rank test with Bonferroni correction.

**Supplementary Figure 2.** The impact of SIM01 on the gut microbial diversity at phylum and order level

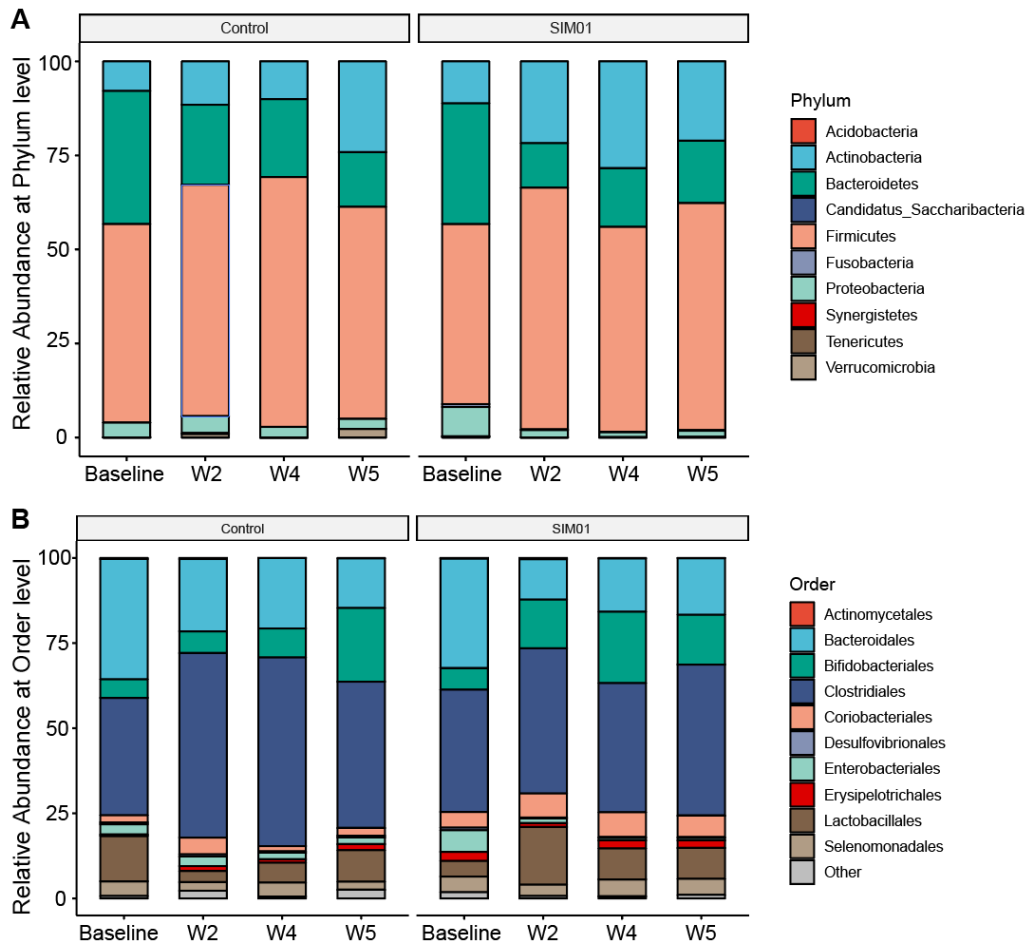

**Figure legend:** **A.** Mean relative at Relative abundance at phylum level at baseline, week 2, week 4 and week 5 in the SIM01 and control groups. **B.** Mean relative at Relative abundance at order level at baseline, week 2, week 4 and week 5 in the SIM01 and control groups.

### Supplementary Figure 3. Mean and 95% CI for 100 times of subsampling

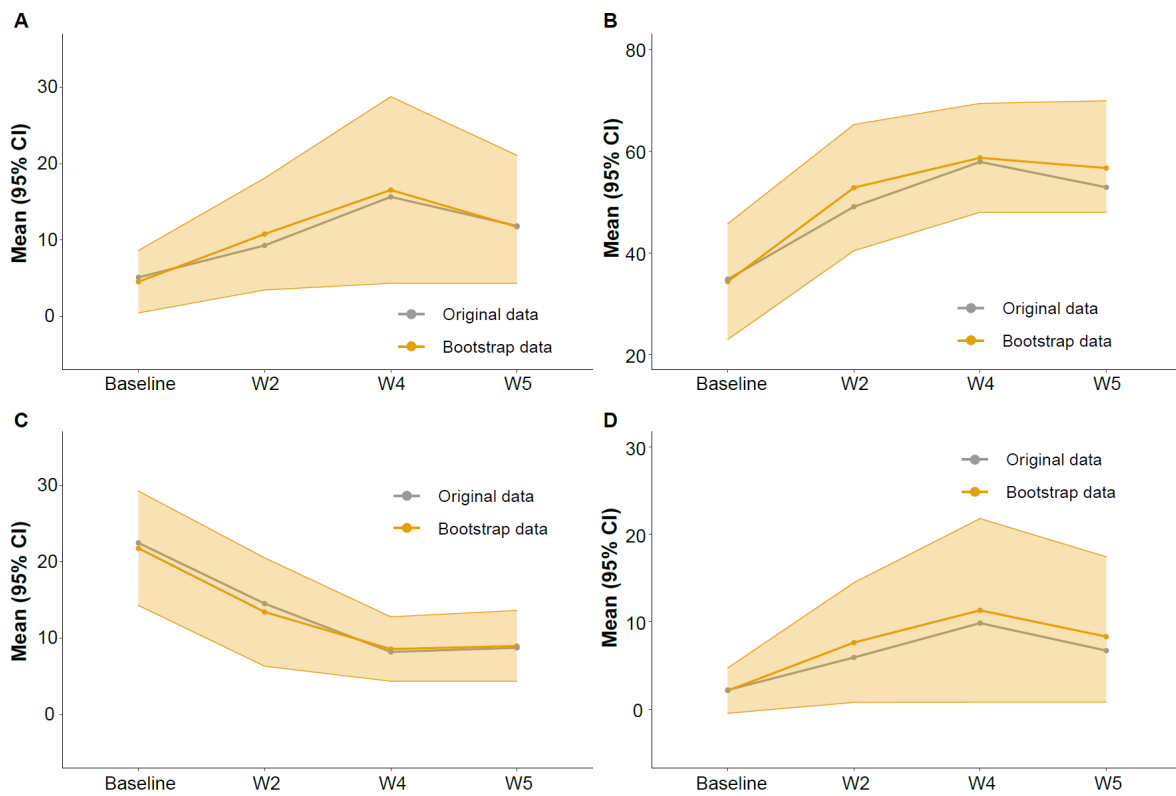

**Figure legend:** Mean and 95% CI for 100 times of subsampling are depicted. **A.** Bootstrap data for total abundance of probiotic species in SIM01. **B.** Bootstrap data for total abundance of bacterial species depleted in COVID-19 patients. **C.** Bootstrap data for total abundance of bacterial species enriched in COVID-19 patients. **D.** Bootstrap data for abundance of *B. adolescentis* after SIM01 treatment. Grey line (original data); orange line (bootstrap data).

**Supplementary Table 1.** The impact of SIM01 on the gut microbiota at species level at Week 5

| Species                                    |                     | log2FoldChange | Adjusted p value |
|--------------------------------------------|---------------------|----------------|------------------|
| <i>Fusobacterium varium</i>                | Decreased at week 5 | -13.55215521   | 7.44E-05         |
| <i>Veillonella parvula</i>                 | Decreased at week 5 | -6.068494877   | 3.44E-04         |
| <i>Escherichia coli</i>                    | Decreased at week 5 | -4.182168969   | 5.48E-05         |
| <i>Clostridium bolteae</i>                 | Decreased at week 5 | -2.962670134   | 2.02E-04         |
| <i>Clostridium hathewayi</i>               | Decreased at week 5 | -2.651254916   | 0.0323593        |
| <i>Bacteroides caccae</i>                  | Decreased at week 5 | -1.774449533   | 0.00244275       |
| <i>Bacteroides xylanisolvens</i>           | Decreased at week 5 | -1.586831898   | 0.029841257      |
| <i>Bacteroides thetaiotaomicron</i>        | Decreased at week 5 | -1.017302515   | 0.039582649      |
| <i>Parabacteroides distasonis</i>          | Decreased at week 5 | -0.936770137   | 0.040365898      |
| <i>Faecalibacterium prausnitzii</i>        | Increased at week 5 | 1.772224535    | 0.017780547      |
| <i>Bifidobacterium longum</i>              | Increased at week 5 | 1.857775702    | 0.029841257      |
| <i>Gordonibacter pamelaee</i>              | Increased at week 5 | 2.038224315    | 0.039582649      |
| <i>Collinsella aerofaciens</i>             | Increased at week 5 | 2.262809793    | 2.36E-04         |
| <i>Dorea longicatena</i>                   | Increased at week 5 | 2.299855058    | 7.44E-05         |
| <i>Ruminococcus sp 5 1 39BFAA</i>          | Increased at week 5 | 2.334996081    | 0.0323593        |
| <i>Streptococcus salivarius</i>            | Increased at week 5 | 2.396230537    | 0.009991312      |
| <i>Streptococcus parasanguinis</i>         | Increased at week 5 | 2.449409466    | 0.004014728      |
| <i>Eubacterium hallii</i>                  | Increased at week 5 | 2.501266794    | 1.01E-04         |
| <i>Eubacterium ramulus</i>                 | Increased at week 5 | 2.563473563    | 0.040097587      |
| <i>Ruminococcus obeum</i>                  | Increased at week 5 | 2.591205871    | 3.27E-09         |
| <i>Adlercreutzia equolifaciens</i>         | Increased at week 5 | 2.631502419    | 0.048330022      |
| <i>Dorea formicigenerans</i>               | Increased at week 5 | 2.649581947    | 0.017747723      |
| <i>Coprococcus catus</i>                   | Increased at week 5 | 2.774034238    | 0.017636927      |
| <i>Lachnospiraceae bacterium 5 1 63FAA</i> | Increased at week 5 | 2.818095129    | 0.005917225      |

|                                          |                     |             |             |
|------------------------------------------|---------------------|-------------|-------------|
| <i>Eubacterium rectale</i>               | Increased at week 5 | 3.786915702 | 0.002114212 |
| <i>Bifidobacterium adolescentis</i>      | Increased at week 5 | 3.872783933 | 0.015540752 |
| <i>Coprococcus comes</i>                 | Increased at week 5 | 4.260491064 | 0.001608894 |
| <i>Bifidobacterium pseudocatenulatum</i> | Increased at week 5 | 4.513841999 | 1.17E-04    |
| <i>Clostridium leptum</i>                | Increased at week 5 | 4.728114182 | 0.002166021 |
| <i>Clostridium bartlettii</i>            | Increased at week 5 | 9.186039416 | 3.42E-09    |
| <i>Lactococcus garvieae</i>              | Increased at week 5 | 16.35294196 | 8.63E-07    |

**Supplementary Table 2.** Correlations between microbial functions and plasma inflammation markers

| <b>Plasma inflammation markers</b> | <b>Gut microbial functions</b>                                               | <b>R</b>    | <b>P value</b> |
|------------------------------------|------------------------------------------------------------------------------|-------------|----------------|
| <b>MCP1</b>                        | PWY-6590: superpathway of Clostridium acetobutylicum acidogenic fermentation | -0.4661001  | 0.01120384     |
| <b>IL6</b>                         | PWY-5941: glycogen degradation II (eukaryotic)                               | -0.45657183 | 0.03246406     |
| <b>IL6</b>                         | PWY-6507: 4-deoxy-L-threo-hex-4-enopyranuronate degradation                  | -0.43863075 | 0.04746892     |
| <b>IL6</b>                         | P162-PWY: L-glutamate degradation V (via hydroxyglutarate)                   | 0.086904296 | 5.08E-04       |
| <b>IL6</b>                         | PWY0-1479: tRNA processing                                                   | 0.145415568 | 3.61E-04       |
| <b>IL6</b>                         | PWY-7198: pyrimidine deoxyribonucleotides de novo biosynthesis IV            | 0.156946565 | 0.04389681     |
| <b>IL6</b>                         | PWY-7210: pyrimidine deoxyribonucleotides biosynthesis from CTP              | 0.184185225 | 0.03408422     |
| <b>MCP1</b>                        | NAGLIPASYN-PWY: lipid IVA biosynthesis                                       | 0.193627451 | 0.04860949     |
| <b>IL18</b>                        | PWY-6936: seleno-amino acid biosynthesis                                     | 0.252605811 | 0.0191918      |
| <b>MCP1</b>                        | P162-PWY: L-glutamate degradation V (via hydroxyglutarate)                   | 0.302212214 | 0.03116647     |
| <b>IL18</b>                        | PWY66-398: TCA cycle III (animals)                                           | 0.336217397 | 0.01405937     |
| <b>MCP1</b>                        | PWY0-862: (5Z)-dodec-5-enoate biosynthesis                                   | 0.345800188 | 0.04860654     |
| <b>IL6</b>                         | PWY-6284: superpathway of unsaturated fatty acids biosynthesis (E. coli)     | 0.347624154 | 0.00299421     |
| <b>MCP1</b>                        | PWY-7388: octanoyl-[acyl-carrier protein] biosynthesis (mitochondria, yeast) | 0.348252671 | 0.04142349     |
| <b>MCSF</b>                        | PWY-6531: mannitol cycle                                                     | 0.357217254 | 0.02542461     |
| <b>MCSF</b>                        | PWY0-845: superpathway of pyridoxal 5'-phosphate biosynthesis and salvage    | 0.357217254 | 0.02254836     |
| <b>MCSF</b>                        | PYRIDOXSYN-PWY: pyridoxal 5'-phosphate biosynthesis I                        | 0.357217254 | 0.02085337     |
| <b>MCSF</b>                        | PWY-5971: palmitate biosynthesis II (bacteria and plants)                    | 0.357436339 | 0.01254865     |
| <b>MCSF</b>                        | PWY-7388: octanoyl-[acyl-carrier protein] biosynthesis (mitochondria, yeast) | 0.357436339 | 0.02342056     |
| <b>MCSF</b>                        | PWY-7664: oleate biosynthesis IV (anaerobic)                                 | 0.357436339 | 0.02392005     |
| <b>MCSF</b>                        | PWY0-862: (5Z)-dodec-5-enoate biosynthesis                                   | 0.357436339 | 0.02690538     |
| <b>MCP1</b>                        | PWY-5971: palmitate biosynthesis II (bacteria and plants)                    | 0.360515089 | 0.04522212     |
| <b>MCP1</b>                        | PWY-6282: palmitoleate biosynthesis I (from (5Z)-dodec-5-enoate)             | 0.360515089 | 0.04822185     |
| <b>MCP1</b>                        | PWY-7664: oleate biosynthesis IV (anaerobic)                                 | 0.360515089 | 0.04388111     |

|               |                                                                          |             |            |
|---------------|--------------------------------------------------------------------------|-------------|------------|
| <b>IL1RA</b>  | PWY-6138: CMP-N-acetylneuraminate biosynthesis I (eukaryotes)            | 0.367798958 | 0.02848334 |
| <b>IL6</b>    | PWY-7003: glycerol degradation to butanol                                | 0.381699329 | 0.04434183 |
| <b>IL6</b>    | PWY-7196: superpathway of pyrimidine ribonucleosides salvage             | 0.390756601 | 0.02792876 |
| <b>MCSF</b>   | NAGLIPASYN-PWY: lipid IVA biosynthesis                                   | 0.40824829  | 0.00493903 |
| <b>MCSF</b>   | PWY-4984: urea cycle                                                     | 0.40824829  | 0.00170098 |
| <b>MCP1</b>   | PWY-5179: toluene degradation V (aerobic) (via toluene-cis-diol)         | 0.40824829  | 0.04070735 |
| <b>CXCL10</b> | PWY-5179: toluene degradation V (aerobic) (via toluene-cis-diol)         | 0.40824829  | 3.87E-04   |
| <b>MCP1</b>   | PWY-5180: toluene degradation I (aerobic) (via o-cresol)                 | 0.40824829  | 0.04070735 |
| <b>CXCL10</b> | PWY-5180: toluene degradation I (aerobic) (via o-cresol)                 | 0.40824829  | 3.87E-04   |
| <b>MCP1</b>   | PWY-5182: toluene degradation II (aerobic) (via 4-methylcatechol)        | 0.40824829  | 0.04070735 |
| <b>CXCL10</b> | PWY-5182: toluene degradation II (aerobic) (via 4-methylcatechol)        | 0.40824829  | 3.87E-04   |
| <b>MIG</b>    | PWY-5509: adenosylcobalamin biosynthesis from cobyrinate a,c-diamide I   | 0.40824829  | 8.82E-04   |
| <b>MIG</b>    | PWY-5871: ubiquinol-9 biosynthesis (eukaryotic)                          | 0.40824829  | 8.82E-04   |
| <b>MIG</b>    | PWY-5873: ubiquinol-7 biosynthesis (eukaryotic)                          | 0.40824829  | 8.82E-04   |
| <b>MCSF</b>   | PWY-7003: glycerol degradation to butanol                                | 0.40824829  | 0.03262827 |
| <b>IL18</b>   | PWY-5509: adenosylcobalamin biosynthesis from cobyrinate a,c-diamide I   | 0.408498673 | 8.74E-04   |
| <b>IL18</b>   | PWY-5871: ubiquinol-9 biosynthesis (eukaryotic)                          | 0.408498673 | 8.74E-04   |
| <b>IL18</b>   | PWY-5873: ubiquinol-7 biosynthesis (eukaryotic)                          | 0.408498673 | 8.74E-04   |
| <b>MCSF</b>   | PWY-6282: palmitoleate biosynthesis I (from (5Z)-dodec-5-enoate)         | 0.408498673 | 0.00995845 |
| <b>MCSF</b>   | PWY-6284: superpathway of unsaturated fatty acids biosynthesis (E. coli) | 0.408498673 | 3.47E-04   |
| <b>IL1RA</b>  | PWY-7374: 1,4-dihydroxy-6-naphthoate biosynthesis I                      | 0.408498673 | 0.0013775  |
| <b>MCSF</b>   | P162-PWY: L-glutamate degradation V (via hydroxyglutarate)               | 0.409252593 | 0.00288907 |
| <b>MCSF</b>   | PWY-7198: pyrimidine deoxyribonucleotides de novo biosynthesis IV        | 0.409252593 | 0.04930692 |
| <b>MCSF</b>   | PWY-7210: pyrimidine deoxyribonucleotides biosynthesis from CTP          | 0.409252593 | 0.04460937 |
| <b>MCSF</b>   | PWY0-1479: tRNA processing                                               | 0.413345221 | 8.11E-07   |
| <b>IL6</b>    | NAGLIPASYN-PWY: lipid IVA biosynthesis                                   | 0.43345517  | 0.01257136 |
| <b>CXCL10</b> | PWY66-409: superpathway of purine nucleotide salvage                     | 0.450980392 | 0.03171542 |

|               |                                                                                             |             |            |
|---------------|---------------------------------------------------------------------------------------------|-------------|------------|
| <b>MCP1</b>   | PWY-6126: superpathway of adenosine nucleotides de novo biosynthesis II                     | 0.463235294 | 0.03770801 |
| <b>CXCL10</b> | NAD-BIOSYNTHESIS-II: NAD salvage pathway II                                                 | 0.473039216 | 0.01491173 |
| <b>MCP1</b>   | PWY-7220: adenosine deoxyribonucleotides de novo biosynthesis II                            | 0.473039216 | 0.03988149 |
| <b>MCP1</b>   | PWY-7222: guanosine deoxyribonucleotides de novo biosynthesis II                            | 0.473039216 | 0.03988149 |
| <b>IL6</b>    | PWY-6318: L-phenylalanine degradation IV (mammalian, via side chain)                        | 0.475873693 | 0.01417966 |
| <b>MCP1</b>   | PWY-7229: superpathway of adenosine nucleotides de novo biosynthesis I                      | 0.477941176 | 0.03291406 |
| <b>IL6</b>    | PROTocatechuate-ortho-cleavage-PWY: protocatechuate degradation II (ortho-cleavage pathway) | 0.496876075 | 0.0303078  |
| <b>IL6</b>    | PWY-7117: C4 photosynthetic carbon assimilation cycle, PEPCK type                           | 0.503325555 | 0.01264789 |
| <b>IL1RA</b>  | PWY-622: starch biosynthesis                                                                | 0.525427083 | 4.51E-04   |
| <b>MCP1</b>   | PWY-2941: L-lysine biosynthesis II                                                          | 0.575980392 | 0.03196995 |
| <b>MIG</b>    | PWY-6936: seleno-amino acid biosynthesis                                                    | 0.590686275 | 2.2E-04    |
| <b>MCP1</b>   | PWY66-409: superpathway of purine nucleotide salvage                                        | 0.593137255 | 0.00615523 |
| <b>CXCL10</b> | P562-PWY: myo-inositol degradation I                                                        | 0.606173878 | 8.61E-04   |
| <b>MCP1</b>   | PWY-7187: pyrimidine deoxyribonucleotides de novo biosynthesis II                           | 0.632352941 | 0.01441646 |
| <b>MCP1</b>   | PWY-6123: inosine-5'-phosphate biosynthesis I                                               | 0.644607843 | 0.02566031 |
| <b>CXCL10</b> | PWY-6270: isoprene biosynthesis I                                                           | 0.647058824 | 0.00231275 |
| <b>CXCL10</b> | PWY-7560: methylerythritol phosphate pathway II                                             | 0.659313725 | 0.00177093 |
